# Supplementary material for: In vitro induction and identification of polyploid Neolamarckia cadamba plants by colchicine treatment
Source: PeerJ. 2021 Oct 27;9:e12399. doi: 10.7717/peerj.12399 (PMC8556713; doi:10.7717/peerj.12399)
Supplement: Supplemental Information 1 [file peerj-09-12399-s001.xlsx]

## Sheet: Regeneration
		Number of shoots	Percentage		Number of shoots	Percentage		Number of shoots	Percentage
		tetraploid			mixoploid			octoploid
	Rep 1
1		6			6			4
2		5			4
3		5			3			5
4		5			4			3
5		8			4			4
6		4			4			4
		5.5	100		4.16667	100		4	83.3333
	Rep 2
1					5			3
2		4			6			4
3		6			4			4
4		8			5			4
5		5			3			4
6		4			2
		5.4	83.3333		4.16667	100		3.8	83.3333
	Rep 3
1		6			4
2		5			5			4
3		6			4			6
4		5			6			5
5		4			5			5
6		5			4			4
		5.16667	100		4.66667	100		4.8	83.3333

## Sheet: Growth
	Height
		tetraploid		mixoploid		octoploid
	Rep 1
1		7		7		4.7
2		7.4		6.8		4.5
3		7.2		6.9		4.3
4		7		6.7		4.1
5		7.3		7		4.4
6		7		6.5		4.6
		7.15		6.81667		4.43333
	Rep 2
1		7		7.1		4.5
2		7.2		6.9		4.2
3		7		6.7		4.5
4		7.3		7		4.3
5		7.3		6.5		4.7
6		7.2		7.1		4.6
		7.16667		6.88333		4.46667
	Rep 3
1		7.3		7		4.6
2		7		6.6		4
3		7.2		7		4
4		7.2		6.8		4.7
5		7.4		6.7		4.3
6		7		7.1		4.3
		7.18333		6.86667		4.31667
	Number of leaf
		tetraploid		mixoploid		octoploid
	Rep 1
1		12		14		12
2		14		12		14
3		12		14		14
4		12		12		14
5		12		12		12
6		12		12		12
		12.3333		12.6667		13
	Rep 2
1		12		14		12
2		12		14		12
3		12		12		14
4		14		14		12
5		14		12		12
6		14		14		16
		13		13.3333		13
	Rep 3
1		14		12		12
2		12		12		14
3		12		14		12
4		12		12		12
5		14		12		14
6		14		14		14
		13		12.6667		13
	Number of nodes
		tetraploid		mixoploid		octoploid
	Rep 1
1		6		7		6
2		7		6		7
3		6		7		7
4		6		6		7
5		6		6		6
6		6		6		6
		6.16667		6.33333		6.5
	Rep 2
1		6		7		6
2		6		7		6
3		6		6		7
4		7		7		6
5		7		6		6
6		7		7		8
		6.5		6.66667		6.5
	Rep 3
1		7		6		6
2		6		6		7
3		6		7		6
4		6		6		6
5		7		6		7
6		7		7		7
		6.5		6.33333		6.5
	Stem Diameter
		tetraploid		mixoploid		octoploid
	Rep 1
1		2		3		3
2		3		3		3
3		2		3		3
4		2		3		3
5		2		2		3
6		2		2		3
		2.16667		2.66667		3
	Rep 2
1		2		3		3
2		2		3		2
3		2		3		3
4		3		3		3
5		3		2		3
6		3		3		3
		2.5		2.83333		2.83333
	Rep 3
1		3		2		3
2		2		2		3
3		2		3		3
4		2		2		3
5		2		3		3
6		3		3		2
		2.33333		2.5		2.83333

## Sheet:  Rooting
Number of roots										Root Length
		tetraploid		mixoploid		octoploid
											Rep 1							Rep 2							Rep 3
	Rep 1									Tetraploid
1	1	12		22		11					1	2	3	4	5	6		1	2	3	4	5	6		1	2	3	4	5	6
2	2	16		15		8				1	2.5	3.2	3.5	3	3.3	3.3		3.2	2.8	3	3.2	2.6	2.8		3	3.2	3.2	3	3.2	3.3
3	3	11		12		12				2	2.5	3	3	2.8	3.3	3.1		3	2.6	2.7	2.2	2.6	2.6		2.8	2.5	3	3	3	2.6
4	4	14		15		9				3	2.4	2.6	2.5	2.8	3.3	2.8		3	2.6	2.7	2.2	2.6	2.5		2.6	2.5	2.8	2.8	2.8	2.3
5	5	13		10		10				4	2.2	2.6	2.2	2.6	2.8	2.3		2.3	2.6	2.7	2.2	2.4	2.5		2.5	2.2	2.5	2.5	2.3	2.3
6	6	15		18		9				5	2	2.6	1.8	2.5	2	2		1.8	2.5	2.5	2	2.3	2.2		2.5	2.2	2	2.5	2.3	2.3
		13.5		15.3333		9.83333				6	1.8	2.5	1.7	2.3	1.8	2		1.8	2.5	2.5	2	2.3	2.2		2	2.2	1.5	2.3	2.2	2
										7	1.8	2.5	1.5	2	1.8	2		1.6	2.2	2	1.8	2.3	2		2	2	1	2.2	2	1.8
	Rep 2									8	1.8	2	1.5	1.8	1.5	1.8		1.5	2	1.8	1.8	2	2		1.8	1.5	1	2.2	2	1.8
1	1	14		13		14				9	1.7	2	1.2	1.8	1.3	1.5		1.5	1.8	1.6	1.5	1.8	1.6		1.6	1.2	0.5	2	1.5	1.8
2	2	15		20		12				10	1.7	1.8	1.2	1.6	1.2	1.5		1.2	1.8	1.2	1.5	1.2	1.2		1.5	1	0.5	1.2	1.2	1.2
3	3	17		15		10				11	1.5	1.6	0.5	0.5	0.5	1.2		1.2	1.4	1.2	1.3	1.2	1		1	0.5		1.2	1	1.2
4	4	15		18		9				12	1	1.6		0.5	0.3	1.2		1	1	1	1.2	1.2	1		0.5	0.5		1	0.8	1.2
5	5	18		19		8				13		1.5		0.2	0.3	0.5		1	1	0.8	1	1.2	0.8		0.5			0.6		0.5
6	6	14		16		13				14		1		0.2		0.5		1	0.5	0.8	1	1	0.5					0.6
		15.5		16.8333		11				15		1				0.2			0.3	0.8	0.8	1
										16		1								0.5		0.5
	Rep 3									17										0.2		0.5
1	1	13		14		13				18												0.5
2	2	12		11		10				19
3	3	10		21		10				20
4	4	14		16		17
5	5	12		19		14					1.90833	2.03125	1.87273	1.75714	1.8	1.72667		1.79286	1.84	1.64706	1.71333	1.62222	1.77857		1.86923	1.79167	1.8	1.93571	2.025	1.86923
6	6	13		17		9
		12.3333		16.3333		12.1667
										Mixoploid
											1	2	3	4	5	6		1	2	3	4	5	6		1	2	3	4	5	6
										1	2.5	2.8	2.8	3	3	2.5		3	3	2.8	2.9	3	3		3.2	3.3	2.7	3	2.8	3.2
										2	2.4	2.5	2.5	2.6	1.8	2.5		2.6	2.8	2.5	2.5	3	2.8		3	3	2.5	2.8	2.5	3
										3	2.4	2.5	2.5	2.3	1.8	2.4		2.6	2.8	2.5	2.4	2.5	2.5		3	3	2.5	2.8	2.5	3
										4	2.2	2	2	2	1.8	2.4		2.2	2.6	2.4	2.4	2.3	2.5		2.8	2.4	2.4	2	2.4	2.2
										5	2.2	2	2	1.8	1.6	2.3		2	2.6	2.3	1.8	2.3	1.8		2.5	2	2.4	2	2.4	2.2
										6	1.8	1.8	1.8	1.8	1.5	2.3		2	2.4	2.3	1.5	2	1.8		2	1.8	2	2	2.3	2
										7	1.8	1.8	1.8	1.5	1.5	2		1.7	2.2	2.3	1.5	2	1.5		2	1.5	2	1.5	2	1.5
										8	1.6	1.5	1.5	1.3	1.2	2		1.5	2.2	2	1.2	1.5	1.5		1.5	1	2	1.2	2	1.5
										9	1.6	1.2	1.2	1	1.2	1.5		1.2	2	1.8	1.2	1.5	1.3		1.2	1	1.5	1.2	1.8	1.2
										10	1.4	1	1	1	1	1.2		1.2	2	1.5	1.2	1.5	1		0.8	0.6	1.5	1	1.8	1.2
										11	1.4	1	1	1		1.2		1.2	1.8	1.5	1	1.5	1		0.5	0.6	1.2	1	1.4	1
										12	1.3	0.8	0.8	0.8		0.8		1	1.5	1.2	1	1	1		0.5	0.3	1.2	1	1.4	0.8
										13	1.2	0.8		0.5		0.8		1	1.5	1.2	0.6	1	1		0.5		1.2	0.8	0.8	0.8
										14	1	0.6		0.5		0.5			1.2	1	0.6	1	0.8		0.3		1.2	0.5	0.8	0.6
										15	1	0.6		0.5		0.5			1.2	1	0.5	0.8	0.8				1	0.5	0.8	0.5
										16	1					0.5			1		0.5	0.8	0.8				1	0.5	0.5	0.5
										17	1					0.5			1		0.5	0.8					1		0.5	0.3
										18	1					0.5			0.5		0.5	0.3					0.8		0.3
										19	1								0.5			0.3					0.8		0.3
										20	0.8								0.5								0.8
										21	0.5																0.5
										22	0.3
											1.42727	1.52667	1.74167	1.44	1.64	1.46667		1.78462	1.765	1.88667	1.32222	1.53158	1.56875		1.7	1.70833	1.53333	1.4875	1.54211	1.5
										Octoploid
											1	2	3	4	5	6		1	2	3	4	5	6		1	2	3	4	5	6
										1	2	1.8	1.9	2	2.3	2.2		2.2	2.5	2.2	2.5	2.4	2.2		2.4	1.8	2.2	2.5	2.4	1.8
										2	1.8	1.5	1.8	1.6	2	1.8		2	2	2.2	2.3	2,2	2.2		2.2	1.8	2	2.5	2.4	1.5
										3	1.8	1.5	1.8	1.6	2	1.8		2	1.8	2	2.3	2	2		2	1.7	1.8	2.2	2.2	1.5
										4	1.7	1.2	1.7	1.5	1.7	1.5		1.8	1.8	1.8	2	2	2		2	1.6	1.5	2	1.5	1.2
										5	1.8	1	1.6	1.5	1.8	1.5		1.8	1.5	1.8	1.8	1.5	1.5		1.8	1.5	1.1	1.8	1.5	1.2
										6	1.8	1	1.5	1.5	1.6	1.2		1.5	1.2	1.5	1.5	1	1.5		1.5	1.5	1	1.5	1.2	1
										7	1.6	0.8	1.5	1.2	1.5	1.2		1.2	1.2	1.5	1	0.8	1.3		1.2	1.5	1	1.4	1.2	1
										8	1.2	0.8	1.5	1	1.2	0.8		1.2	1.2	0.5	1	0.5	1.3		1.2	1.2	1	1.4	1.2	1
										9	1		1.2	1	1	0.5		1	0.8	0.5	0.6		1.2		1	1.2	0.7	1	1	0.8
										10	1		1.2		0.3			1	0.8	0.2			1.2		1	0.5	0.5	1	1
										11	0.8		1					0.8	0.5				1		0.5			0.8	1
										12			1					0.8	0.5				0.8		0.5			0.8	1
										13								0.5	0.3				0.5		0.2			0.5	0.5
										14								0.5										0.5	0.5
										15																		0.5
										16																		0.3
										17																		0.3
											1.5	1.2	1.475	1.43333	1.54	1.38889		1.30714	1.23846	1.42	1.66667	1.45714	1.43846		1.34615	1.43	1.28	1.23529	1.32857	1.22222

## Sheet: Acclimatization
		tetraploid			mixoploid			octoploid
Jiff		6	100		5	83.3333		6	100
Jiff		5	83.3333		6	100		5	83.3333
Jiff		6	100		6	100		6	100
			94.4444			94.4444			94.4444
Soil		5	83.3333		6	100		5	83.3333
Soil		5	83.3333		5	83.3333		6	100
Soil		6	100		6	100		5	83.3333
			88.8889			94.4444			88.8889
Soil Com		4	66.6667		3	50		4	66.6667
Soil Com		2	33.3333		4	66.6667		4	66.6667
Soil Com		3	50		4	66.6667		4	66.6667
			50			61.1111			66.6667

## Sheet: Leaf Thickness
	Thickness	Vertical	Horizontal
1	0.172	0.752	0.828
1	0.129	0.606	0.523
1	0.5011	0.648	0.606
1	0.1325	0.636	0.472
1	0.116	0.712	0.551
1	0.139	0.675	0.576
1	0.1185	0.551	0.524
1	0.0884	0.701	0.763
1	0.1075	0.579	0.509
1	0.104	0.806	0.81
2	0.232	0.589	0.775
2	0.178	0.694	0.668
2	0.2005	0.737	0.719
2	0.2395	0.812	0.852
2	0.1875	0.706	0.692
2	0.157	0.744	0.619
2	0.1985	0.647	0.741
2	0.166	0.798	0.818
2	0.1885	1	0.886
2	0.2225	0.897	1.16
3	0.2425	0.861	0.939
3	0.24	0.809	0.987
3	0.282	0.69	0.988
3	0.1605	0.492	0.771
3	0.1885	0.823	0.762
3	0.27	1.2	1.32
3	0.326	0.785	0.8
3	0.24	1.08	0.918
3	0.2815	0.822	0.763
3	0.241	0.755	0.743
	1=tetraploid
	2=mixoploid
	3=octoploid

## Sheet: Stomata & Trichomes
Stomata Density				Trichomes Density			Stomata Saiz
	1	448.485		1	36.3636		Tetraploid			Mixoploid			Octoploid
	1	412.121		1	48.4848		Length	Width		Length	Width		Length	Width
	1	424.242		1	24.2424		0.0236	0.0146		0.0311	0.0171		0.0326	0.0185
	1	387.879		1	48.4848		0.0241	0.0137		0.0357	0.0162		0.0295	0.0176
	1	472.727		1	24.2424		0.0252	0.0118		0.0379	0.0173		0.0325	0.0161
	1	460.606		1	24.2424		0.0205	0.0163		0.0312	0.0148		0.0327	0.0165
	1	400		1	48.4848		0.0224	0.0119		0.0322	0.0165		0.0313	0.0176
	1	387.879		1	36.3636		0.0249	0.0157		0.0342	0.0142		0.0336	0.0187
	1	436.364		1	36.3636		0.022	0.0135		0.0326	0.0131		0.0275	0.016
	1	436.364		1	12.1212		0.0206	0.0115		0.0304	0.0164		0.0358	0.0181
	2	278.788		2	12.1212		0.0192	0.0131		0.0346	0.0192		0.0307	0.0193
	2	290.909		2	12.1212		0.0185	0.0123		0.0293	0.0152		0.0345	0.0174
	2	266.667		2	0		0.0247	0.0185		0.0277	0.0184		0.0277	0.0176
	2	290.909		2	12.1212		0.0271	0.0171		0.0326	0.0206		0.0289	0.0187
	2	303.03		2	0		0.022	0.0135		0.0303	0.0161		0.0243	0.015
	2	278.788		2	0		0.0247	0.0174		0.0308	0.0154		0.0312	0.0163
	2	315.152		2	0		0.0243	0.0198		0.0324	0.0158		0.0265	0.0164
	2	327.273		2	0		0.024	0.0143		0.0312	0.0166		0.0252	0.0165
	2	315.152		2	12.1212		0.0244	0.019		0.03	0.0166		0.0335	0.0165
	2	315.152		2	0		0.0263	0.0142		0.0299	0.0153		0.0282	0.0173
	3	266.667		3	0		0.024	0.0149		0.0311	0.0162		0.0285	0.0178
	3	290.909		3	0		0.0275	0.0168		0.0319	0.0154		0.0277	0.018
	3	266.667		3	0		0.0168	0.0115		0.0367	0.0159		0.0238	0.0167
	3	303.03		3	0		0.0269	0.0143		0.0192	0.029		0.0323	0.0193
	3	278.788		3	0		0.0233	0.0155		0.0309	0.0152		0.0214	0.0138
	3	339.394		3	0		0.024	0.0166		0.0329	0.0159		0.0286	0.0166
	3	303.03		3	0		0.0272	0.0182		0.0286	0.0183		0.0216	0.0131
	3	266.667		3	12.1212		0.0226	0.018		0.0327	0.018		0.0314	0.0178
	3	351.515		3	24.2424		0.0235	0.017		0.0354	0.018		0.0268	0.0159
	3	351.515		3	12.1212		0.0256	0.0165		0.0301	0.0202		0.0273	0.0141
							0.0248	0.0175		0.0306	0.0169		0.0301	0.0152
	1=tetraploid						0.0275	0.0174		0.031	0.0169		0.0242	0.0178
	2=mixoploid						0.0282	0.017		0.0365	0.0165		0.0358	0.0182
	3=octoploid						0.0258	0.0141		0.0319	0.0171		0.0273	0.015
							0.0311	0.0186		0.0309	0.017		0.0291	0.0184
							0.0268	0.0147		0.0288	0.017		0.0291	0.0162
							0.0256	0.015		0.026	0.0183		0.0237	0.0144
							0.0258	0.0145		0.032	0.0215		0.028	0.016
							0.0274	0.0195		0.0348	0.0148		0.0267	0.0166
							0.0252	0.0162		0.0285	0.0166		0.0318	0.0153
							0.0264	0.0154		0.0321	0.0174		0.0269	0.0191
							0.0271	0.0172		0.0202	0.028		0.0301	0.0175
							0.0244	0.0182		0.0309	0.0196		0.0319	0.0189
							0.0242	0.0145		0.0346	0.0178		0.0333	0.0213
							0.0238	0.0171		0.0351	0.0162		0.0294	0.0177
							0.0264	0.0156		0.0357	0.0153		0.0291	0.0147
							0.0296	0.0154		0.0292	0.0168		0.0346	0.0166
							0.0284	0.0144		0.0322	0.0144		0.0258	0.0145
							0.0223	0.014		0.0347	0.0142		0.0348	0.0186
							0.0255	0.0147		0.0327	0.0153		0.0304	0.0162
							0.0246	0.0128		0.0342	0.0132		0.0259	0.0151
							0.024	0.0131		0.0337	0.0143		0.0345	0.0209
							0.026	0.0155		0.0306	0.0149		0.0331	0.0182
							0.0278	0.0158		0.0313	0.0173		0.0269	0.0117
							0.0212	0.0152		0.0317	0.0157		0.0324	0.0128
							0.0281	0.0155		0.0336	0.0177		0.0354	0.0174
							0.0271	0.0137		0.0271	0.0149		0.0267	0.0165
							0.0244	0.0135		0.0239	0.0145		0.0255	0.0157
							0.0265	0.0151		0.0324	0.0128		0.0306	0.0165
							0.0259	0.0158		0.0296	0.0153		0.0282	0.0148
							0.0256	0.0172		0.0238	0.0136		0.0243	0.0138
							0.0276	0.0167		0.0326	0.0159		0.0304	0.0169
							0.0212	0.0125		0.026	0.0145		0.032	0.0145
							0.0246	0.0169		0.0264	0.0165		0.0343	0.0167
							0.0296	0.0128		0.0342	0.0166		0.0286	0.0162
							0.0263	0.012		0.0365	0.0117		0.0286	0.0167
							0.0276	0.0172		0.0305	0.0192		0.0298	0.0178
							0.028	0.0138		0.0253	0.0194		0.0258	0.0173
							0.0255	0.0147		0.0286	0.0175		0.0282	0.0145
							0.0246	0.0101		0.0293	0.0154		0.0281	0.0177
							0.0257	0.0153		0.0346	0.0174		0.0248	0.0157
							0.0271	0.016		0.0298	0.0152		0.0341	0.0152
							0.0239	0.0113		0.0282	0.0174		0.0279	0.0154
							0.0261	0.0147		0.0285	0.0156		0.0258	0.0162
							0.0255	0.0177		0.0275	0.0171		0.0285	0.0147
							0.0298	0.016		0.0297	0.0176		0.0301	0.0166
							0.0257	0.0125		0.0317	0.0194		0.0318	0.0149
							0.0276	0.0124		0.0298	0.02		0.031	0.0182
							0.0211	0.0113		0.0291	0.0191		0.0244	0.0122
							0.0284	0.0167		0.0268	0.0165		0.0253	0.0103
							0.0247	0.0143		0.0352	0.0188		0.025	0.0158
							0.0268	0.0147		0.0328	0.0156		0.0286	0.0163
							0.0271	0.0132		0.0292	0.0189		0.0277	0.0132
							0.0225	0.0131		0.0314	0.0182		0.0276	0.0145
							0.0226	0.0198		0.0278	0.0167		0.0317	0.0132
							0.026	0.0166		0.0281	0.0168		0.0303	0.0165
							0.0293	0.0138		0.032	0.0151		0.0312	0.0151
							0.0255	0.0119		0.0326	0.0179		0.0323	0.0142
							0.0267	0.0131		0.0334	0.0161		0.0347	0.0134
							0.0248	0.0134		0.0288	0.015		0.0339	0.0132
							0.0268	0.0139		0.0298	0.0152		0.0317	0.0146
							0.0295	0.0132		0.0294	0.0178		0.0326	0.0159
							0.0266	0.0153		0.0258	0.0158		0.0287	0.0161
							0.0247	0.0101		0.0267	0.0159		0.025	0.0149
							0.0253	0.013		0.0289	0.0147		0.0288	0.0175
							0.0275	0.0142		0.0298	0.0147		0.0277	0.0138
							0.0234	0.0132		0.0264	0.015		0.028	0.0143
							0.0261	0.0135		0.0289	0.0125		0.0279	0.0136
							0.025	0.0136		0.0309	0.0144		0.0284	0.0147
							0.0275	0.0168		0.0356	0.0155		0.0289	0.0161
							0.0284	0.0151		0.0273	0.0168		0.0347	0.0202
							0.0248	0.0115		0.0264	0.015		0.0288	0.0129

## Sheet: Stem cross-section
	Bark	Wood	Pith
1	0.03	0.335	0.535
1	0.06	0.34	0.54
1	0.04	0.24	0.64
2	0.05	0.41	0.54
2	0.03	0.37	0.5
2	0.045	0.315	0.52
3	0.03	0.41	0.33
3	0.03	0.31	0.41
3	0.04	0.41	0.35
1=tetraploid
2=mixoploid
3=octoploid

## Sheet: SPAD value
	SPAD value
1	34.3
1	36.8
1	41.8
1	36.4
1	34.8
1	35.3
1	33.8
1	35.9
1	40.1
1	41.9
2	38.8
2	37.6
2	36
2	36.3
2	34.9
2	37.5
2	39.2
2	38.3
2	36.7
2	37.1
3	37.5
3	39.4
3	37.9
3	39.6
3	42.7
3	37.1
3	39.1
3	40.7
3	40.7
3	41.9
1=tetraploid
2=mixoploid
3=octoploid
